# Supplementary material for: Microstructural asymmetries of the planum temporale predict functional lateralization of auditory-language processing
Source: Research Square preprint supplement (doi:10.21203/rs.3.rs-2380259/v1), 2023-01-12
Supplement: Supplementary file 1 [file b4ef86065802465bea83d4d4.docx]

Supplementary Materials for

**Microstructural asymmetries of the planum temporale predict functional lateralization of auditory-language processing**

Peipei Qin,† Qiuhui Bi,† Zeya Guo, Liyuan Yang, Haokun Li, Peng Li, Xinyu Liang, Junhao Luo, Xiangyu Kong, Yirong Xiong, Bo Sun, Sebastian Ocklenburg, Gaolang Gong *

*Corresponding author. gaolang.gong@bnu.edu.cn

**This file includes:**

Figs. S1 to S2

Tables S1 to S10

**
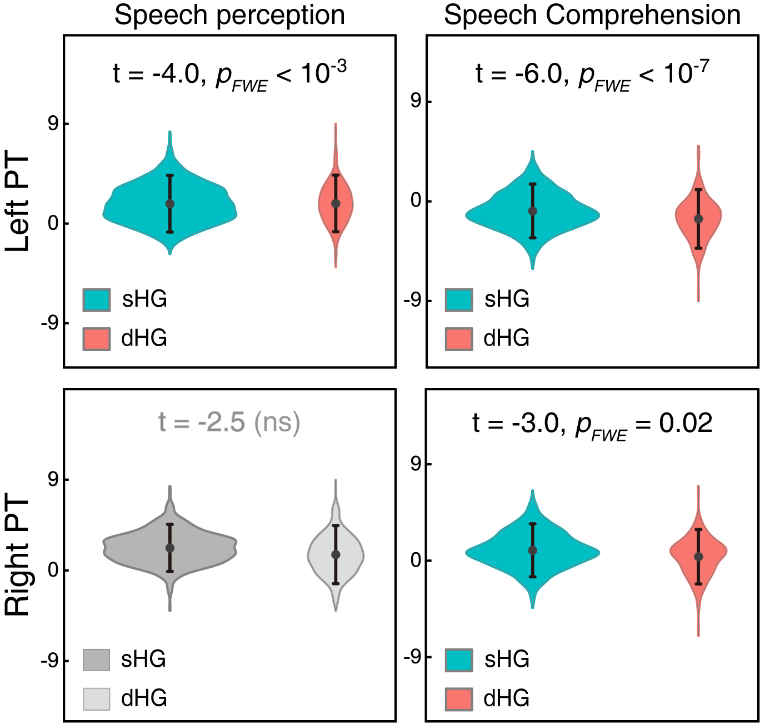
**

Fig. S1. The difference in PT functional activation between subjects with single and duplicated HG. sHG, single Heschl's gyrus; dHG, duplicated Heschl's gyrus; ns, non-significant. Nonsignificant differences (*PFWE*> 0.05) are colored gray.
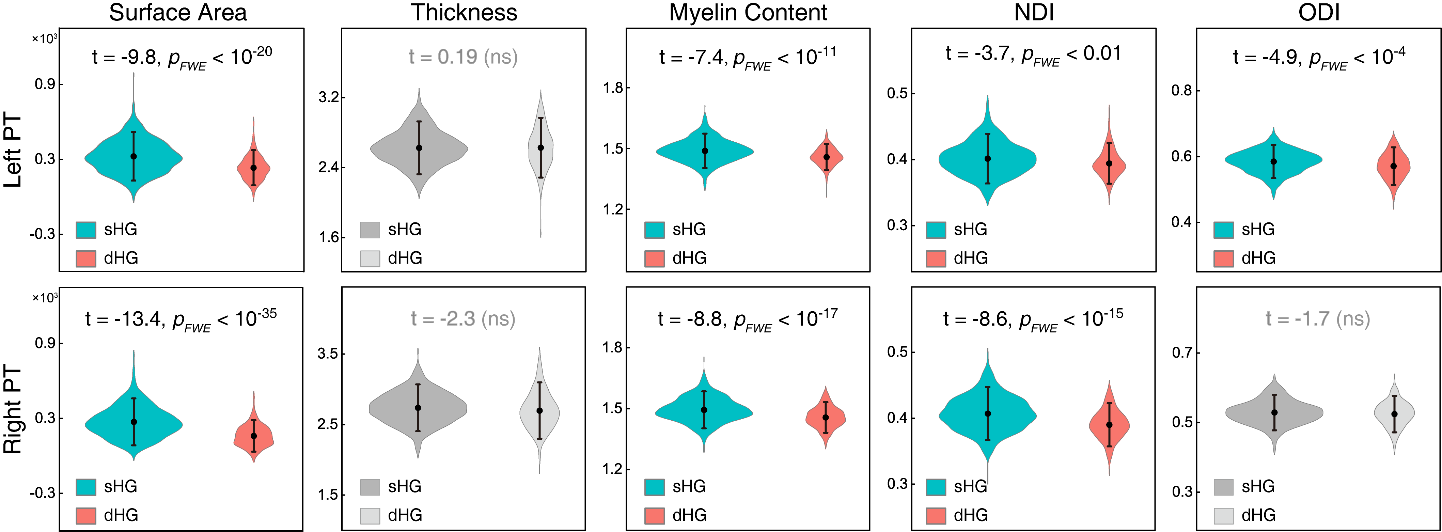


Fig. S2. The difference in PT structural measures between subjects with single and duplicated HG. sHG, single Heschl's gyrus; dHG, duplicated Heschl's gyrus. Nonsignificant differences (*PFWE* > 0.05) are colored gray. NDI, neurite density index; ODI, orientation dispersion index; ns, non-significant.

Table S1. Group-level activation of main contrasts for the HCP fMRI tasks.

| **fMRI task** | **Contrast** | **Left PT** | | **Right PT** | | |
| --- | --- | --- | --- | --- | --- | --- |
| *T* | *PFWE* | | *T* | *PFWE* |
| Language processing | “math – baseline” | 43.6 | < 0.001* | | 31.5 | < 0.001* |
| “story – baseline” | 45.9 | < 0.001* | | 33.6 | < 0.001* |
| “story – math” | 22.0 | < 0.001* | | 15.9 | < 0.001* |
| Working memory | “2Back – 0Back” | -10.8 | > 0.99 | | -13.3 | > 0.99 |
| Incentive processing | “punish – reward” | 3.18 | 0.014* | | 3.37 | 0.007* |
| Emotion processing | “faces – shapes” | -5.12 | > 0.99 | | -9.56 | > 0.99 |
| Social cognition | “random – tom” | 9.47 | < 0.001* | | 11.0 | <0.001* |
| Motor | “AVG – baseline” | 5.59 | < 0.001* | | 0.05 | > 0.99 |
| Relational processing | “match – rel” | 14.5 | < 0.001* | | 14.0 | < 0.001 * |

*PFWE*, corrected *P* value after Bonferroni correction; *, significant activation at the group level. The fMRI tasks showing significant group-level activation in both the left and right PTs are shadowed.

Table S2. Group-level hemispheric asymmetry of PT functional and structural measures

|  | **L1/R1** | | | **L1/R2** | | | | **L2/R1** | | | **L2/R2** | | |
| --- | --- | --- | --- | --- | --- | --- | --- | --- | --- | --- | --- | --- | --- |
| *T* | *PFWE* | | *T* | | *PFWE* | | | *T* | *PFWE* | | *T* | *PFWE* | |
| **Speech perception** | -7.05 | | < 0.001* | | -5.75 | | < 0.001* | | 1.10 | > 0.99 | | -1.98 | > 0.99 | | |
| **Speech comprehension** | -5.04 | | < 0.001* | | -4.77 | | < 0.001* | | 1.83 | > 0.99 | | -1.42 | > 0.99 | | |
| **Surface area** | -6.83 | | < 0.001* | | -14.4 | | < 0.001* | | 2.06 | > 0.99 | | -4.88 | < 0.001* | | |
| **Thickness** | 10.0 | | < 0.001* | | 3.08 | | 0.06 | | 4.39 | < 0.001* | | 3.58 | 0.01 | | |
| **Myelin content** | 0.99 | | > 0.99 | | -5.97 | | < 0.001* | | 6.50 | < 0.001* | | -2.67 | 0.23 | | |
| **NDI** | 4.43 | | < 0.001* | | -4.26 | | < 0.001* | | 4.83 | < 0.001* | | -2.59 | 0.29 | | |
| **ODI** | -26.7 | | < 0.001* | | -15.8 | | < 0.001* | | -8.69 | < 0.001* | | -9.17 | < 0.001* | | |

*PFWE*, corrected *P* value after Bonferroni correction; *, significant hemispheric asymmetry between the left and right PTs; L1/R1, single HG on the left and single HG on the right; L1/R2, single HG on the left and duplicated HG on the right; L2/R1, duplicated HG on the left and single HG on the right; L2/R2, duplicated HG on the left and duplicated HG on the right; NDI, neurite density index; ODI, orientation dispersion index.

Table S3. The interaction effect of “PT structural AI × HG gyrification pattern” on PT nonspeech-related functional AIs (the first specificity analysis)

|  | **Social cognition** | | **Incentive processing** | | **Relational processing** | |
| --- | --- | --- | --- | --- | --- | --- |
| *F* | *PFWE* | *F* | *PFWE* | *F* | *PFWE* |
| **Surface area** | 0.64 | > 0.99 | 1.61 | > 0.99 | 0.42 | > 0.99 |
| **Thickness** | 1.48 | > 0.99 | 0.06 | > 0.99 | 0.24 | > 0.99 |
| **Myelin content** | 0.21 | > 0.99 | 2.75 | > 0.99 | 0.22 | > 0.99 |
| **NDI** | 0.40 | > 0.99 | 0.27 | > 0.99 | 0.19 | > 0.99 |
| **ODI** | 0.66 | > 0.99 | 2.46 | > 0.99 | 2.57 | > 0.99 |

PT, planum temporale; HG, Heschl's gyrus; AI, Asymmetry index; *PFWE*, corrected *P* value after Bonferroni correction; NDI, neurite density index; ODI, orientation dispersion index.

Table S4. The correlations of PT structural AIs with PT nonspeech-related functional activation AIs after controlling for the HG gyrification pattern (the first specificity analysis)

|  | **Social cognition** | | **Incentive processing** | | **Relational processing** | |
| --- | --- | --- | --- | --- | --- | --- |
| *R* | *PFWE* | *R* | *PFWE* | *R* | *PFWE* |
| **Surface area** | -0.07 | > 0.99 | -0.03 | > 0.99 | 0.04 | > 0.99 |
| **Thickness** | -0.02 | > 0.99 | 0.04 | > 0.99 | -0.01 | > 0.99 |
| **Myelin content** | 0.04 | > 0.99 | 0.03 | > 0.99 | -0.09 | 0.16 |
| **NDI** | 0.01 | > 0.99 | -0.01 | > 0.99 | -0.09 | 0.25 |
| **ODI** | 0.07 | 0.95 | 0.04 | > 0.99 | 0.01 | > 0.99 |

PT, planum temporale; HG, Heschl's gyrus; AI, Asymmetry index; *PFWE*, corrected *P* value after Bonferroni correction; NDI, neurite density index; ODI, orientation dispersion index.

Table S5. The interaction effect of “PT structural measure × HG gyrification pattern” on PT nonspeech-related functional activation for each hemisphere (the first specificity analysis)

|  | | **Social cognition** | | **Incentive processing** | | **Relational processing** | |
| --- | --- | --- | --- | --- | --- | --- | --- |
| *F* | *PFWE* | *F* | *PFWE* | *F* | *PFWE* |
| **Left** | **Surface area** | 2.74 | > 0.99 | 0.67 | > 0.99 | 0.53 | > 0.99 |
| **Thickness** | 0.34 | > 0.99 | 0.98 | > 0.99 | 0.53 | > 0.99 |
| **Myelin content** | 4.61 | 0.96 | 2.57 | > 0.99 | 1.24 | > 0.99 |
| **NDI** | 2.39 | > 0.99 | 0.59 | > 0.99 | 0.03 | > 0.99 |
| **ODI** | 0.33 | > 0.99 | 0.14 | > 0.99 | 0.38 | > 0.99 |
| **Right** | **Surface area** | 0.02 | > 0.99 | 0.39 | > 0.99 | 0.39 | > 0.99 |
| **Thickness** | 0.04 | > 0.99 | 2.56 | > 0.99 | 5.00 | 0.77 |
| **Myelin content** | 0.11 | > 0.99 | 0.39 | > 0.99 | 0.33 | > 0.99 |
| **NDI** | 2.54 | > 0.99 | 0.27 | > 0.99 | 0.25 | > 0.99 |
| **ODI** | 1.69 | > 0.99 | 2.48 | > 0.99 | 0.05 | > 0.99 |

PT, planum temporale; HG, Heschl's gyrus; *PFWE*, corrected *P* value after Bonferroni correction; NDI, neurite density index; ODI, orientation dispersion index.

Table S6. The correlations of PT structural measures with PT nonspeech-related functional activation for each hemisphere after controlling for the HG gyrification pattern (the first specificity analysis)

|  | | **Social cognition** | | **Incentive processing** | | **Relational processing** | |
| --- | --- | --- | --- | --- | --- | --- | --- |
| *R* | *PFWE* | *R* | *PFWE* | *R* | *PFWE* |
| **Left** | **Surface area** | 0.04 | > 0.99 | -0.06 | > 0.99 | 0.05 | > 0.99 |
| **Thickness** | 0.02 | > 0.99 | 0.01 | > 0.99 | -0.07 | > 0.99 |
| **Myelin content** | 0.06 | > 0.99 | 0.01 | > 0.99 | -0.05 | > 0.99 |
| **NDI** | -0.002 | > 0.99 | -0.05 | > 0.99 | -0.04 | > 0.99 |
| **ODI** | 0.03 | > 0.99 | -0.03 | > 0.99 | -0.02 | > 0.99 |
| **Right** | **Surface area** | -0.09 | 0.33 | 0.00 | > 0.99 | -0.02 | > 0.99 |
| **Thickness** | -0.04 | > 0.99 | 0.01 | > 0.99 | 0.01 | > 0.99 |
| **Myelin content** | 0.01 | > 0.99 | 0.01 | > 0.99 | -0.09 | 0.32 |
| **NDI** | 0.03 | > 0.99 | 0.01 | > 0.99 | -0.09 | 0.28 |
| **ODI** | -0.002 | > 0.99 | 0.05 | > 0.99 | -0.01 | > 0.99 |

PT, planum temporale; HG, Heschl's gyrus; *PFWE*, corrected *P* value after Bonferroni correction; NDI, neurite density index; ODI, orientation dispersion index.

Table S7. The interaction effect of “PT structural AI × HG gyrification pattern” on speech-related functional AIs of the entire hemisphere (the second specificity analysis)

|  | | **Entire hemisphere** | | | |
| --- | --- | --- | --- | --- | --- |
| **Speech perception** | | **Speech comprehension** | |
| *F* | *PFWE* | *F* | *PFWE* |
| **PT** | **Surface area** | 0.28 | > 0.99 | 0.87 | > 0.99 |
| **Thickness** | 0.13 | > 0.99 | 0.02 | > 0.99 |
| **Myelin content** | 1.77 | > 0.99 | 0.06 | > 0.99 |
| **NDI** | 0.03 | > 0.99 | 1.68 | > 0.99 |
| **ODI** | 0.94 | > 0.99 | 0.27 | > 0.99 |

PT, planum temporale; HG, Heschl's gyrus; AI, Asymmetry index; *PFWE*, corrected *P* value after Bonferroni correction; NDI, neurite density index; ODI, orientation dispersion index.

Table S8. The correlations of PT structural AIs with speech-related functional AI of the entire hemisphere after controlling for the HG gyrification pattern (the second specificity analysis)

|  | | **Entire hemisphere** | | | |
| --- | --- | --- | --- | --- | --- |
| **Speech perception** | | **Speech comprehension** | |
| *R* | *PFWE* | *R* | *PFWE* |
| **PT** | **Surface area** | -0.07 | 0.42 | 0.03 | > 0.99 |
| **Thickness** | -0.07 | 0.50 | -0.05 | > 0.99 |
| **Myelin content** | 0.07 | 0.54 | 0.04 | > 0.99 |
| **NDI** | -0.02 | > 0.99 | 0.03 | > 0.99 |
| **ODI** | 0.04 | > 0.99 | -0.01 | > 0.99 |

PT, planum temporale; HG, Heschl's gyrus; AI, Asymmetry index; *PFWE*, corrected *P* value after Bonferroni correction; NDI, neurite density index; ODI, orientation dispersion index.

Table S9. The interaction effect of “PT structural measure × HG gyrification pattern” on speech-related functional activation of the entire ipsilateral hemisphere (the second specificity analysis)

|  | | **Entire ipsilateral hemisphere** | | | |
| --- | --- | --- | --- | --- | --- |
| **Speech perception** | | **Speech comprehension** | |
| *F* | *PFWE* | *F* | *PFWE* |
| **Left PT** | **Surface area** | 7.45 | 0.13 | 1.46 | > 0.99 |
| **Thickness** | 0.00 | > 0.99 | 0.04 | > 0.99 |
| **Myelin content** | 0.12 | > 0.99 | 0.18 | > 0.99 |
| **NDI** | 0.33 | > 0.99 | 0.20 | > 0.99 |
| **ODI** | 0.51 | > 0.99 | 2.35 | > 0.99 |
| **Right PT** | **Surface area** | 0.37 | > 0.99 | 0.29 | > 0.99 |
| **Thickness** | 0.68 | > 0.99 | 0.46 | > 0.99 |
| **Myelin content** | 0.18 | > 0.99 | 1.22 | > 0.99 |
| **NDI** | 0.22 | > 0.99 | 0.01 | > 0.99 |
| **ODI** | 0.72 | > 0.99 | 0.01 | > 0.99 |

PT, planum temporale; HG, Heschl's gyrus; *PFWE*, corrected *P* value after Bonferroni correction; NDI, neurite density index; ODI, orientation dispersion index.

Table S10. The correlations of PT structural measures with speech-related functional activation of the entire ipsilateral hemisphere after controlling for the HG gyrification pattern (the second specificity analysis)

|  | | **Entire ipsilateral hemisphere** | | | | |
| --- | --- | --- | --- | --- | --- | --- |
| **Speech perception** | | | **Speech comprehension** | |
| *R* | *PFWE* | *R* | | *PFWE* |
| **Left PT** | **Surface area** | 0.01 | > 0.99 | 0.05 | | > 0.99 |
| **Thickness** | -0.01 | > 0.99 | -0.04 | | > 0.99 |
| **Myelin content** | -0.03 | > 0.99 | 0.00 | | > 0.99 |
| **NDI** | -0.03 | > 0.99 | 0.00 | | > 0.99 |
| **ODI** | 0.02 | > 0.99 | 0.01 | | > 0.99 |
| **Right PT** | **Surface area** | 0.02 | > 0.99 | 0.00 | | > 0.99 |
| **Thickness** | 0.05 | > 0.99 | 0.02 | | > 0.99 |
| **Myelin content** | 0.00 | > 0.99 | 0.01 | | > 0.99 |
| **NDI** | 0.03 | > 0.99 | 0.04 | | > 0.99 |
| **ODI** | 0.04 | > 0.99 | 0.00 | | > 0.99 |

PT, planum temporale; HG, Heschl's gyrus; *PFWE*, corrected *P* value after Bonferroni correction; NDI, neurite density index; ODI, orientation dispersion index.
